# Supplementary material
Source: Springer Nature journal article supplement (https://www.springermedizin.de/resource/supplementary/12958_2010_756_MOESM9_ESM.pdf/9568410)
Supplement: MOESM9 [file 9568410]

**Table 1.** Identification by mass spectrometry of canine follicular fluid proteins separated by 2D-PAGE

| Gene  | AC <sup>1</sup> N <sup>o</sup> | Protein name                    | Exp <sup>2</sup>                 | Theo <sup>2</sup> | Score <sup>3</sup> | P N <sup>o</sup> 2 | SC (%) <sup>4</sup> |
|-------|--------------------------------|---------------------------------|----------------------------------|-------------------|--------------------|--------------------|---------------------|
|       |                                |                                 | pI <sup>2</sup> /Mr <sup>2</sup> |                   |                    |                    |                     |
| A2AP  | P28800                         | Alpha-2-antiplasmin             | 6,08/57                          | 5.36/54           | 10.17              | 1                  | 2.2                 |
| ACTG  | Q9UVW9                         | Actin-gamma                     | 5,49/42                          | 5.36/41           | 20.22              | 2                  | 4.8                 |
| AHSG  | P12763                         | Alpha-2-HS-glycoprotein         | 4,66/57                          | 5.16/38           | 10.14              | 1                  | 3.6                 |
| APOA1 | P02648                         | Apolipoprotein A-I              | 5,05/48                          | 5.06/30           | 10.16              | 1                  | 3.4                 |
| APOA1 | P02648                         | Apolipoprotein A-I              | 5,07/24                          | 5.06/30           | 296.41             | 30                 | 72.2                |
| APOA1 | P02648                         | Apolipoprotein A-I              | 6,20/21                          | 5.06/30           | 50.23              | 5                  | 24.1                |
| APOA1 | P02648                         | Apolipoprotein A-I              | 5,07/62                          | 5.06/30           | 40.24              | 4                  | 14.3                |
| APOA4 | Q32PJ2                         | Apolipoprotein A-IV             | 5,44/38                          | 5.17/42           | 50.21              | 5                  | 9.7                 |
| AT3   | P41361                         | Antithrombin-III                | 5,14/55                          | 7.08/52           | 80.20              | 8                  | 8                   |
| AZGP1 | Q3ZCH5                         | Zinc-alpha-2-glycoprotein       | 4,8/33                           | 4.98/33           | 30.14              | 3                  | 10.4                |
| C4    | P01030                         | Complement C4                   | 7,48/31                          | 6.13/101          | 34.19              | 4                  | 4                   |
| CFB   | P81187                         | Complement factor B             | 7,04/59                          | 7.07/85           | 20.21              | 2                  | 3.8                 |
| CFB   | P81187                         | Complement factor B             | 6,38/102                         | 7.5/85            | 20.26              | 2                  | 3.8                 |
| CLU   | P25473                         | Clusterin                       | 5,05/33                          | 5.56/51           | 10.16              | 1                  | 3.6                 |
| CLU   | P25473                         | Clusterin                       | 5,3/31                           | 5.56/51           | 20.16              | 2                  | 6.1                 |
| FGG   | P02679                         | Fibrinogen gamma chain          | 5,8/48                           | 5.27/51           | 56.25              | 6                  | 14.3                |
| GC    | Q3MHN5                         | Vitamin D-binding protein       | 5,17/54                          | 5.24/53           | 70.29              | 7                  | 9.5                 |
| GSN   | Q3SX14                         | Gelsolin                        | 6,01/88                          | 5.45/80           | 20.24              | 2                  | 5.5                 |
| HP    | P19006                         | Haptoglobin                     | 5,31/33                          | 5.68/36           | 60.21              | 6                  | 15.8                |
| HP    | P19006                         | Haptoglobin                     | 5,47/33                          | 5.68/36           | 50.30              | 5                  | 21                  |
| HPR   | Q28801                         | Haptoglobin-related protein     | 5,75/33                          | 7.61/38           | 10.15              | 1                  | 5.8                 |
| ICA   | Q29545                         | Inhibitor of carbonic anhydrase | 6,29/77                          | 5.85/77           | 50.20              | 5                  | 3.6                 |
| PON1  | P27169                         | Paraoxonase/arylesterase 1      | 5,13/42                          | 4.96/39           | 20.27              | 2                  | 7.9                 |
| RBP4  | P18902                         | Retinol-binding protein 4       | 5,45/20                          | 5.33/21           | 40.21              | 4                  | 12                  |
| TF    | Q29443                         | Serotransferrin                 | 7,05/72                          | 6.69/77           | 42.25              | 5                  | 7.7                 |

The experimental position of identified spots is shown in Figure 5.

<sup>1</sup> AC is an accession number from the UniProt database

<sup>2</sup> Exp: Experimental; Theo: Theoretical; pI: Isoelectric point; Mr: Molecular weight; P N<sup>o</sup>: Peptid number; SC: Sequence coverage

<sup>3</sup> Score is  $-10 \cdot \log(P)$ , where P is the probability that the observed match is a random event, it is based on NCBIInr database using the MASCOT searching program

<sup>4</sup> Sequence coverage (%) is based on number of peptide masses matched in NCBIInr databases
